# Supplementary material
Source: MDPI journal article supplement (https://www.mdpi.com/1999-4907/7/11/263)
Supplement: s1 [file s1]

Supplementary Materials: Mitigating the Stress of Drought on Soil Respiration by Selective Thinning: Contrasting Effects of Drought on Soil Respiration of Two Oak Species in a Mediterranean Forest

**Chao-Ting Chang, Dominik Sperlich, Santiago Sabaté, Elisenda Sánchez-Costa, Miriam Cotillas, Josep Maria Espelta and Carlos Gracia**


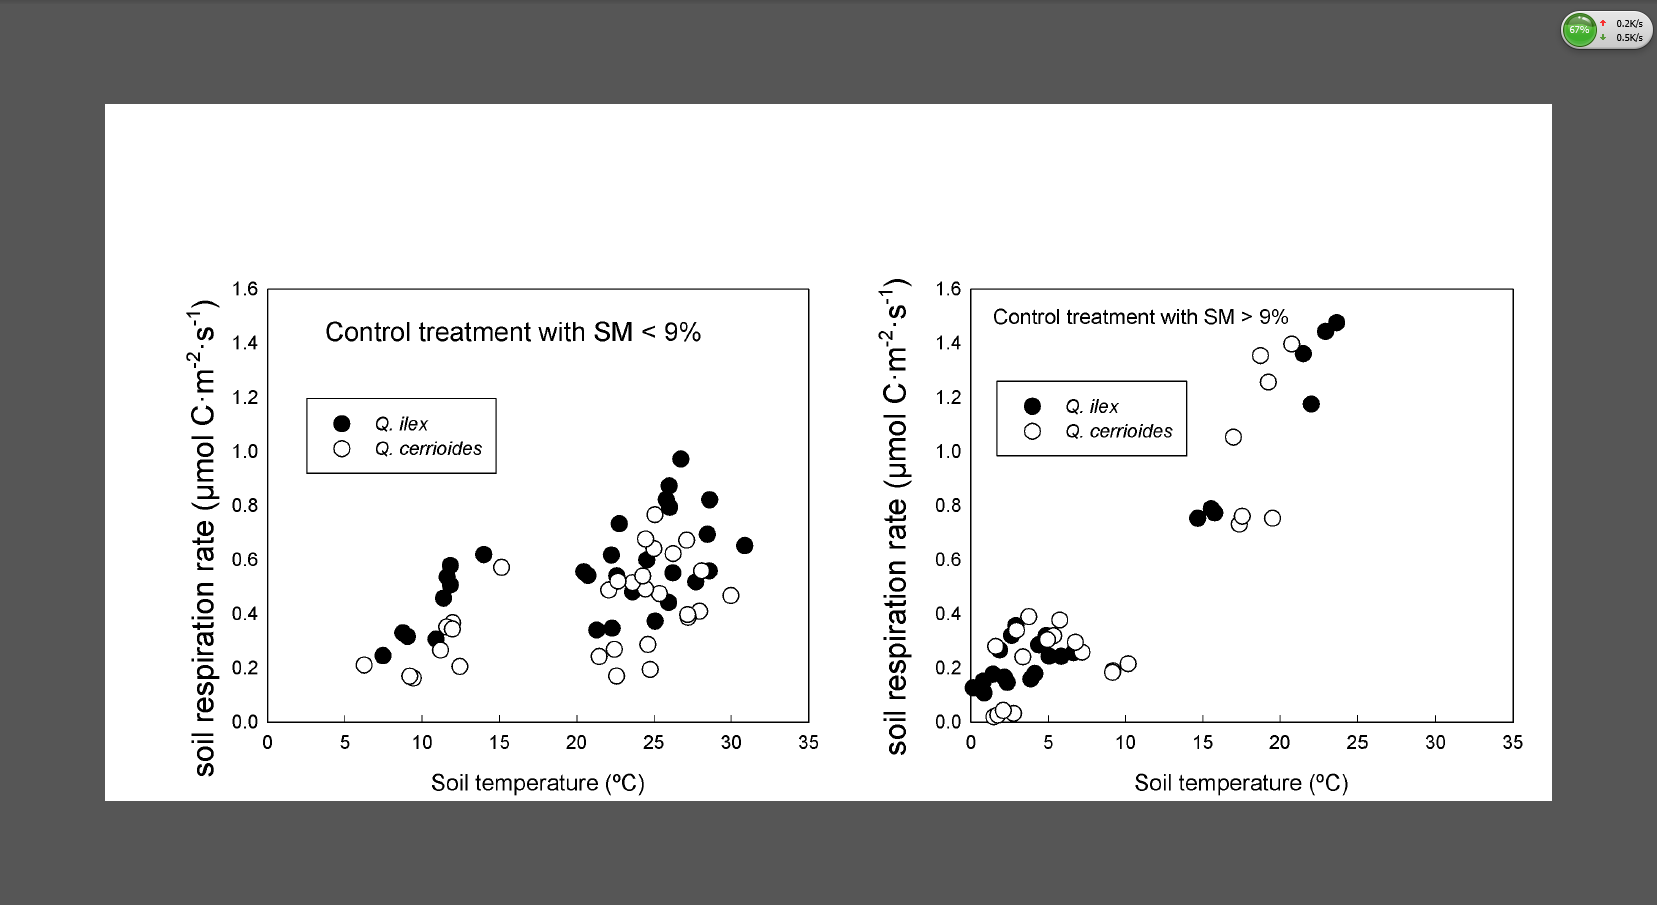


**Figure S1.** Relationship between daily SR and *T*s under *Q. ilex* and *Q. cerrioides* separated by soil moisture regime in the control treatment.


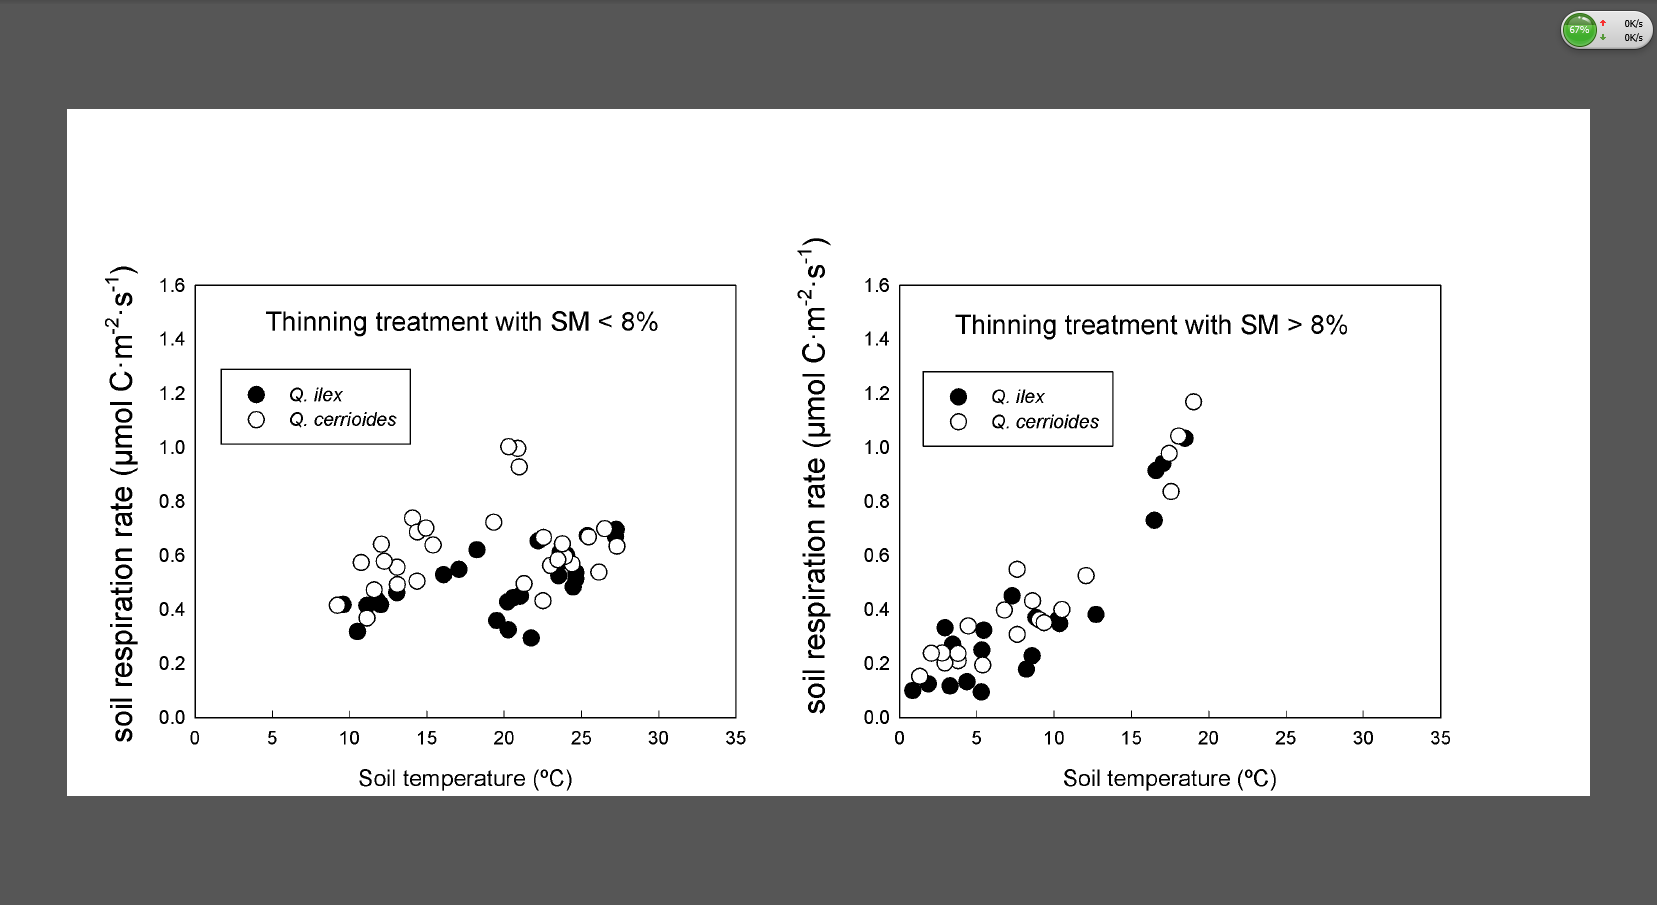


**Figure S2.** Relationship between daily SR and *T*s under *Q. ilex* and *Q. cerrioides* separated by soil moisture regime in the selective thinning treatment.


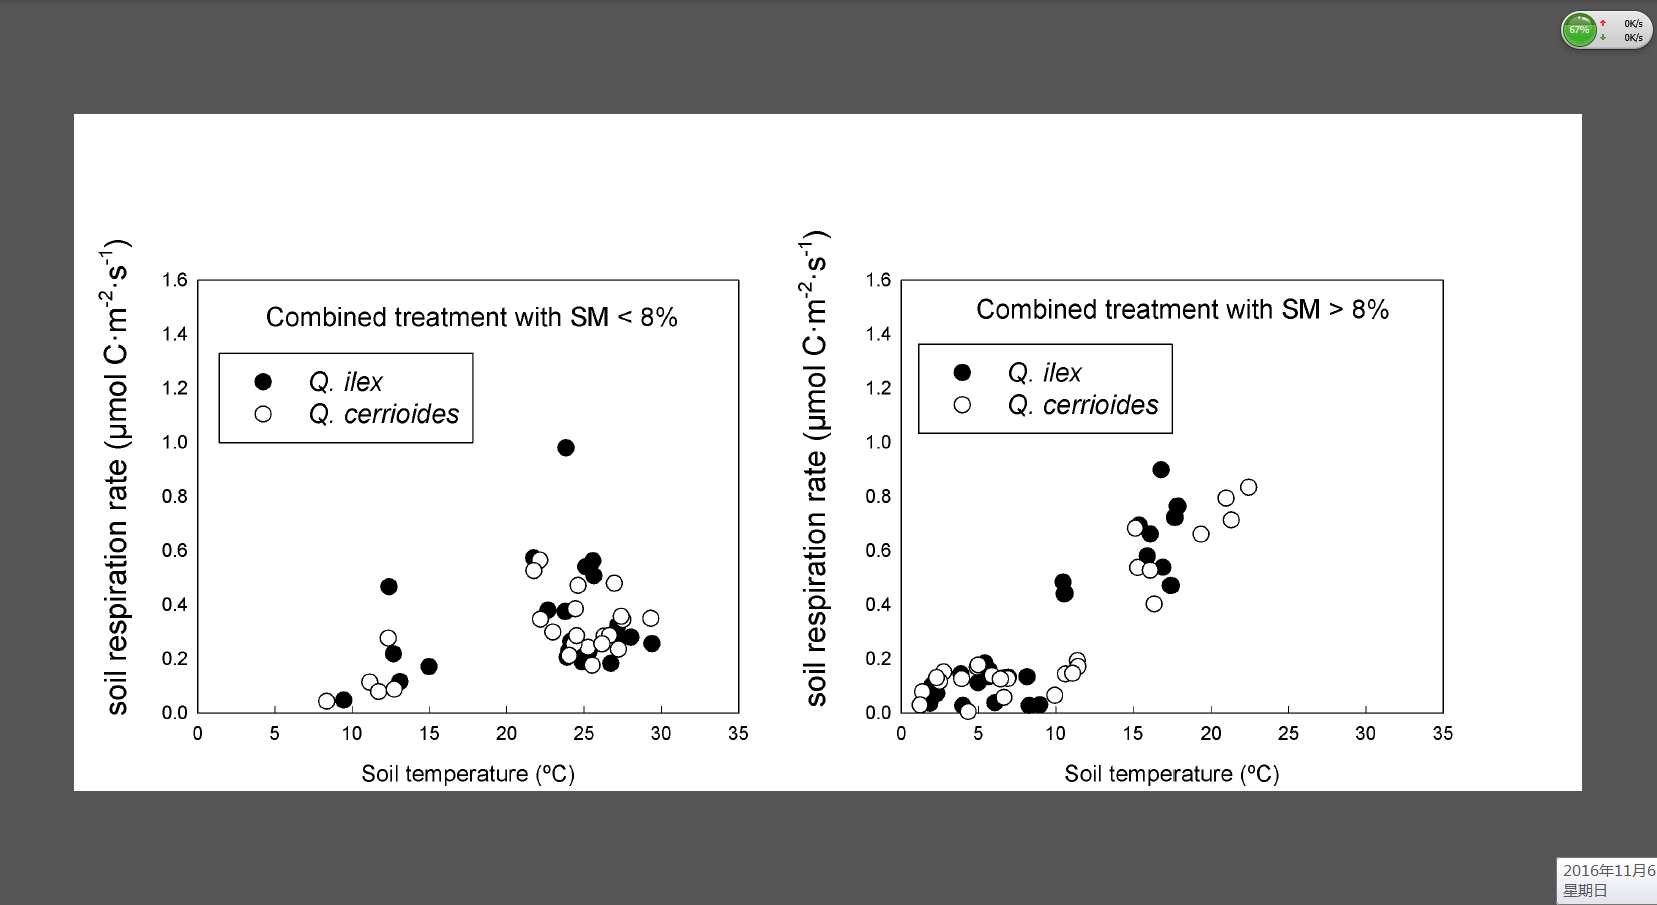


**Figure S3.** Relationship between daily SR and *T*s under *Q. ilex* and *Q. cerrioides* separated by soil moisture regime in the combined treatment.
